# Supplementary material for: Aged G Protein-Coupled Receptor Kinase 3 (Grk3)-Deficient Mice Exhibit Enhanced Osteoclastogenesis and Develop Bone Lesions Analogous to Human Paget’s Disease of Bone
Source: MDPI journal article supplement (doi:10.3390/cells12070981), 2023-03-23

Supplemental Figure S1. Osteoclast-rich TRAP<sup>+</sup> cortical bone lesions are seen in aged *Grk3*<sup>-/-</sup> mice and not in age-matched WT controls or in young mice – regardless of genotype. (A) Representative TRAP staining for osteoclasts (purple) of a 12 week old WT femur, (B) a 12 week old *Grk3*<sup>-/-</sup> femur, (C) a 24 month old WT femur, and (D) a 24 month old *Grk3*<sup>-/-</sup> femur. All images were obtained at 5x magnification. Black arrows show osteoclast-rich lesions in the cortical bone of *Grk3*<sup>-/-</sup> 24 month-old femur.

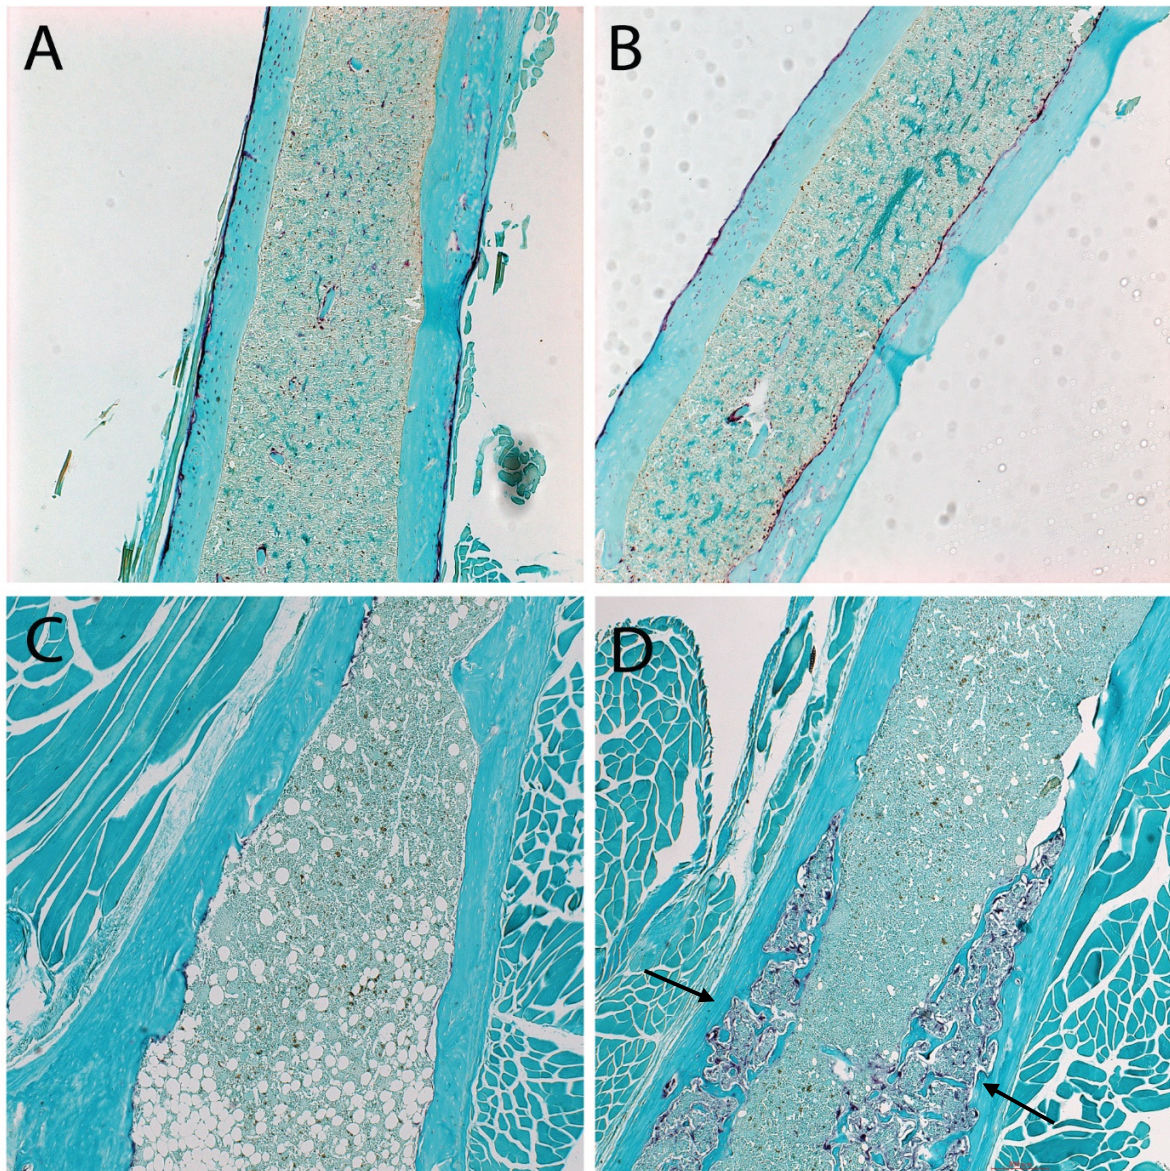

Supplement: s1 [file s1]
